# Supplementary material for: The immunoproteasome catalytic β5i subunit regulates cardiac hypertrophy by targeting the autophagy protein ATG5 for degradation
Source: PubMed Central journal article supplement — Sci Adv. 2019 May 8;5(5):eaau0495. doi: 10.1126/sciadv.aau0495 (PMC6506244; doi:10.1126/sciadv.aau0495), 2019-05-08
Supplement: aau0495_SM.pdf [file aau0495_SM.pdf]

## Supplementary Materials for

### **The immunoproteasome catalytic $\beta 5i$ subunit regulates cardiac hypertrophy by targeting the autophagy protein ATG5 for degradation**

Xin Xie, Hai-Lian Bi, Song Lai, Yun-Long Zhang, Nan Li, Hua-Jun Cao, Ling Han, Hong-Xia Wang\*, Hui-Hua Li\*

\*Corresponding author. Email: hhli1935@aliyun.com (H.-H.L.); whxdy112@ccmu.edu.cn (H.-X.W.)

Published 8 May 2019, *Sci. Adv.* **5**, eaau0495 (2019)

DOI: 10.1126/sciadv.aau0495

#### **This PDF file includes:**

Table S1. Clinical characteristics of HF cohort cases.

Table S2. Multivariable logistic regression analysis of  $\beta 5i$  and chymotrypsin-like activity associated with HF ( $n = 38$ ).

Fig. S1. Analysis of the  $\beta 5i$  protein levels in rat neonatal cardiomyocytes.

Fig. S2. KO of  $\beta 5i$  inhibits phenylephrine (PE)-induced cardiomyocyte hypertrophy.

Fig. S3. Analysis of autophagic influx in rat neonatal cardiomyocytes.

Fig. S4. KO of  $\beta 5i$  decreases chymotrypsin-like activity in mice after TAC operation.

Fig. S5. Analysis of the  $\beta 5i$  expression and survival rate in WT and  $\beta 5i$ -Tg mice.

Fig. S6. Knockdown of ATG5 by rAAV9-siATG5 in mice abolishes the cardioprotective effect of  $\beta 5i$  KO after pressure overload.

Fig. S7. The summarized diagram showing that the proposed mechanisms underlying  $\beta 5i$  regulate cardiac hypertrophy.

## Supplementary Materials

**Table S1. Clinical characteristics of HF cohort cases.**

|                                   | Control (n=38) | HF (n=38)       | p value |
|-----------------------------------|----------------|-----------------|---------|
| <b>Median ages, yrs</b>           | 61.97±0.3724   | 68.58±1.243***  | <0.001  |
| <b>Male</b>                       | 18 (47.3)      | 24(63.1)        | 0.166   |
| <b>Laboratory results</b>         |                |                 |         |
| Chymotryptic-like activity (RLU)  | 516.1±46.34    | 822.6±80.83**   | 0.002   |
| β5i (Psm8, ng/ml)                 | 1.665±0.2448   | 3.428±0.6244*   | 0.0122  |
| NT-proBNP (pg/ml)                 | 67.22±7.294    | 1626.4±242.1*** | <0.001  |
| <b>Cardiovascular risk factor</b> |                |                 |         |
| Alcohol drinking                  | 12             | 8               | 0.297   |
| Smoke                             | 11             | 14              | 0.464   |
| Diabetes                          | 4              | 3               | 0.692   |
| Dyslipidemia                      | 10             | 19*             | 0.034   |
| Obesity                           | 8              | 9               | 0.783   |
| <b>Medications</b>                |                |                 |         |
| ACE inhibitor                     | 0              | 31              | <0.001  |
| Diuretics                         | 0              | 28              | <0.001  |
| Digitalis                         | 0              | 26              | <0.001  |
| Beta-blockers                     | 0              | 16              | <0.001  |
| <b>Examination</b>                |                |                 |         |

|                     |              |                |        |
|---------------------|--------------|----------------|--------|
| HR (beats/min)      | 68.42±1.964  | 70.92±2.625    | 0.4481 |
| Systolic BP (mm Hg) | 127.2±1.94   | 129.2±3.43     | 0.956  |
| LVEF (%)            | 63.34±0.8162 | 32.11±5.568*** | <0.001 |
| LVFS (%)            | 34.34±0.62   | 32.16±1.162    | 0.1014 |

Values are mean ± SEM, n=38 per group.

RLU, relative light units; NT-proBNP, N-terminal pro-B-type natriuretic peptide; HR, heart rate; Systolic BP, systolic blood pressure; LVEF, left ventricular ejection fraction; LVFS, left ventricular fraction shortening. \* $P < 0.05$ , \*\* $P < 0.01$ , \*\*\* $P < 0.001$  versus control.

**Table S2. Multivariable logistic regression analysis of  $\beta$ 5i and chymotrypsin-like activity associated with HF ( $n = 38$ ).**

| Model                      | OR(95%CI)           | P value |
|----------------------------|---------------------|---------|
| $\beta$ 5i (Psmb8)         | 12.153 (2.38-62.08) | 0.003   |
| Chymotryptic-like activity | 1.005 (1.002-1.009) | 0.003   |

All models adjusted for age, sex, alcohol drinking, smoke, diabetes, dyslipidemia and obesity.

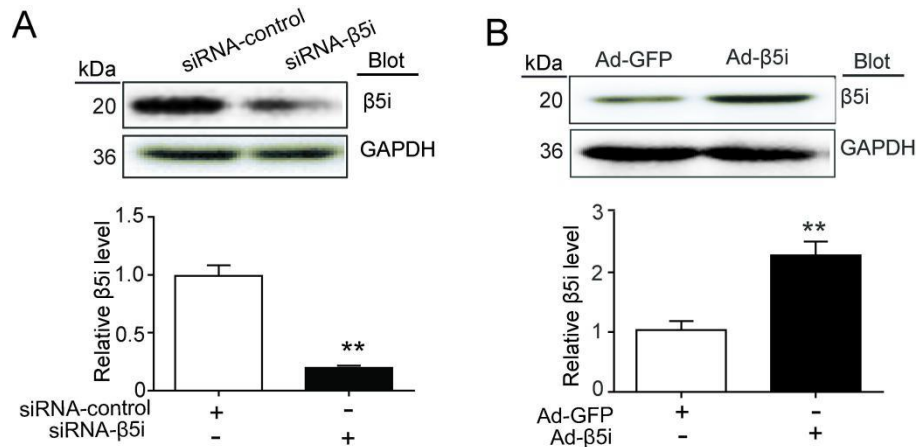

## Supplementary Figure 1

**Fig. S1. Analysis of the β5i protein levels in rat neonatal cardiomyocytes.** (A) Representative western blot analysis of β5i protein expression in neonatal rat cardiomyocytes (NRCMs) infected with adenovirus vector expressing siRNA-control or siRNA-β5i for 24 hours (upper). Quantification of the relative protein levels (lower, n=3). (B) Representative western blot analysis of β5i protein expression in NRCMs infected with adenovirus vector expressing GFP (Ad-GFP) or β5i (Ad-β5i) for 24 hours (upper). Quantification of the relative protein levels (lower, n=3). Data are presented as mean ± SEM, and n represents number of samples per group. \*\* $P < 0.01$  versus siRNA-control or Ad-GFP.

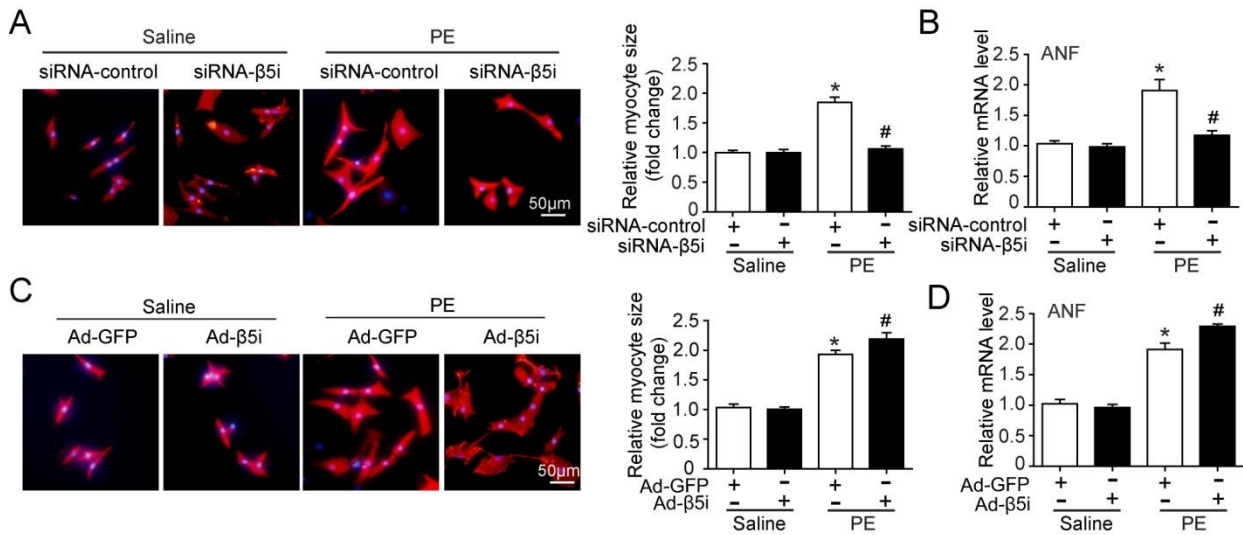

## Supplementary Figure 2

**Fig. S2. KO of β5i inhibits phenylephrine (PE)-induced cardiomyocyte hypertrophy.** (A) Representative images of double immunostaining (green for α-actinin, blue for DAPI) of NRCMs transfected with Ad-siRNA-β5i or siRNA-control after PE stimulation. Scale bar 50 μm. Quantification of cell surface area (at least 150 cells counted per experiment; right). (B) qPCR analyses of ANF mRNA expression (right, n=5). (C) Immunostaining of cardiomyocyte size with α-actinin (red) and DAPI (blue) infected with Ad-GFP or Ad-β5i after PE stimulation. Scale bar 50 μm. Quantification of cell surface area (at least 150 cells counted per experiment; right). (D) qPCR analyses of ANF mRNA expression (right, n=5). For A and B, \* $P < 0.05$  versus siRNA-control+Saline; # $P < 0.05$  versus siRNA-control+PE. For C and D, \* $P < 0.05$  versus Ad-GFP+Saline; # $P < 0.05$  versus Ad-GFP+PE.

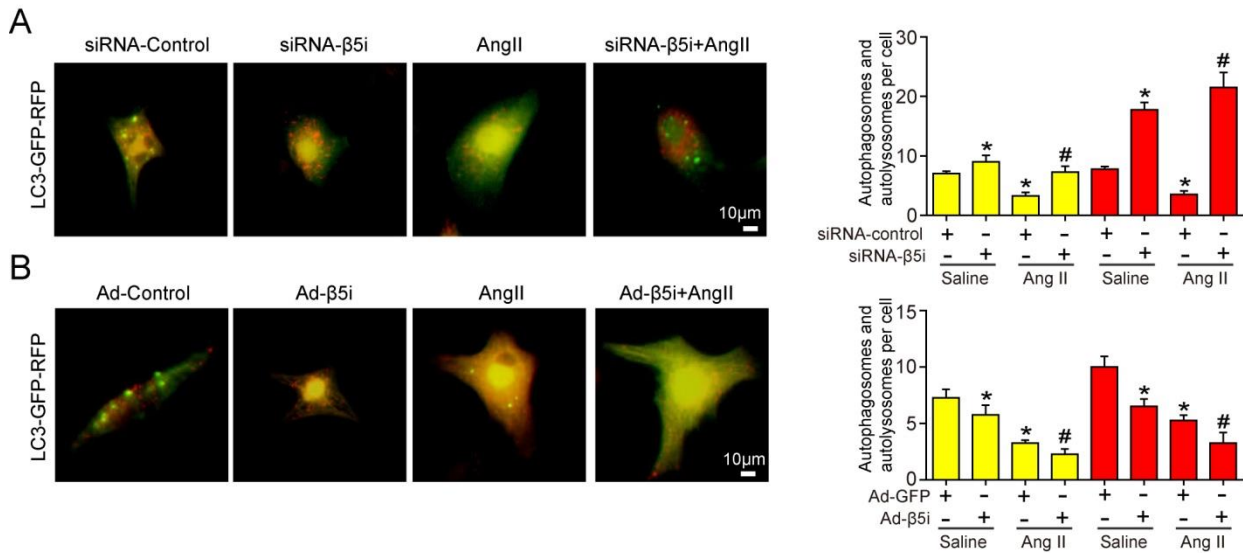

### Supplementary Figure 3

**Fig. S3. Analysis of autophagic influx in rat neonatal cardiomyocytes. (A)** Rat neonatal cardiomyocytes (NRCMs) infected with adenovirus expressing siRNA-control or siRNA-β5i together with mRFP-GFP-LC3-PE, and then treated with Ang II for 24 hours. **(B)** NRCMs infected with adenovirus overexpressing GFP-control or β5i together with mRFP-GFP-LC3-PE, and then treated with Ang II for 24 hours. The autophagic flux was detected with Live Cell Imaging Microscopy. Red colour represents autophagolysosomes, and red/green double-colour shows autophagosomes (left). Scale bar 10 μm. Quantification of autophagosomes and autophagolysosomes (right, n=3). Data are presented as mean ± SEM, and n represents number of samples per group. \**P* < 0.05 versus siRNA-control+Saline or Ad-GFP+Saline; #*P* < 0.05 versus siRNA-control+Ang II or Ad-GFP+Ang II.

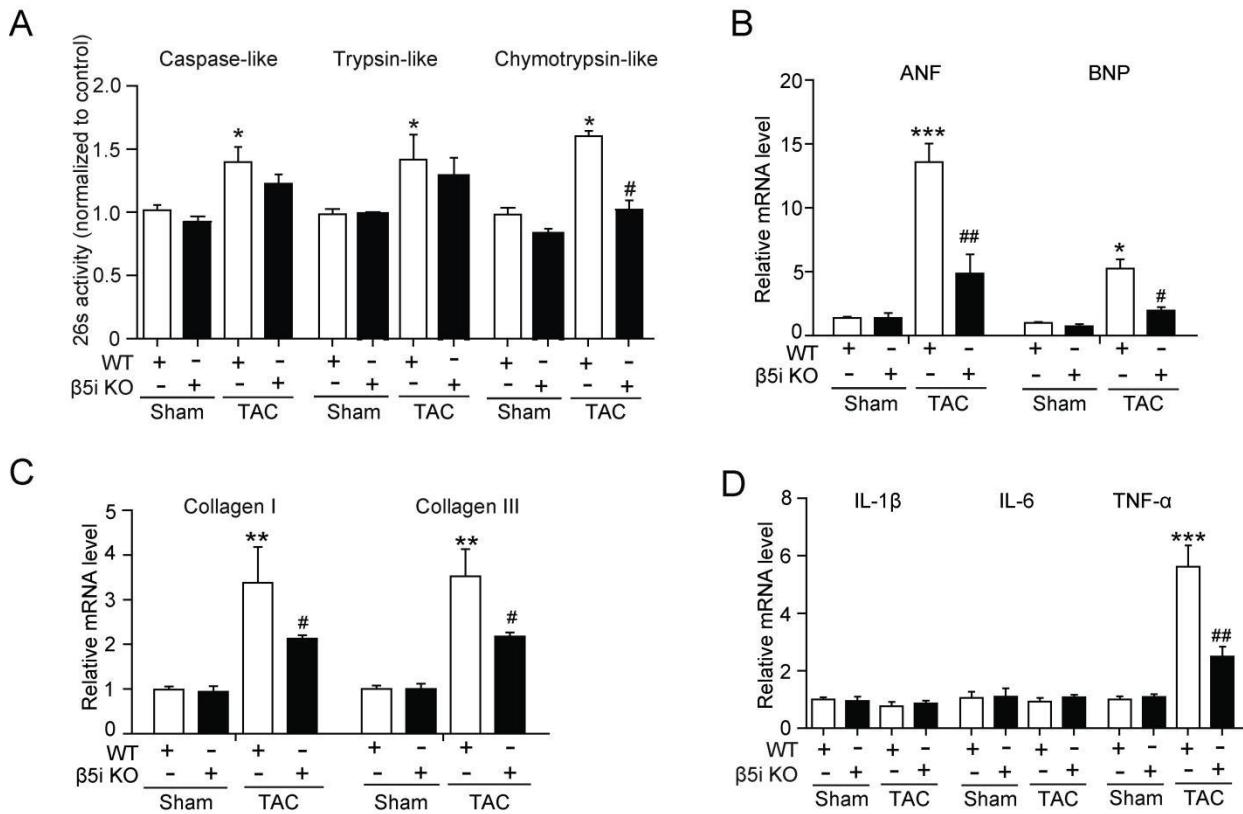

## Supplementary Figure 4

**Fig. S4. KO of β5i decreases chymotrypsin-like activity in mice after TAC operation. (A)** Proteasome activities, including caspase-like, trypsin-like or chymotrypsin-like in the heart tissues of WT or β5i KO mice after 6 weeks of sham or TAC (n=5). **(B, C and D)** qPCR analysis of hypertrophic markers (ANF and BNP), fibrotic markers (collagen I and III) and inflammatory cytokines (IL-1β, IL-6 and TNF-α) mRNA expression in the heart tissues of wild-type (WT) and knockout (β5i KO) mice after 6 weeks of sham or TAC (n=5). Data are presented as mean ± SEM, and n represents number of animals per group. \**P* < 0.05, \*\**P* < 0.01, \*\*\**P* < 0.001 versus WT+sham; #*P* < 0.05, ##*P* < 0.01 versus WT+TAC.

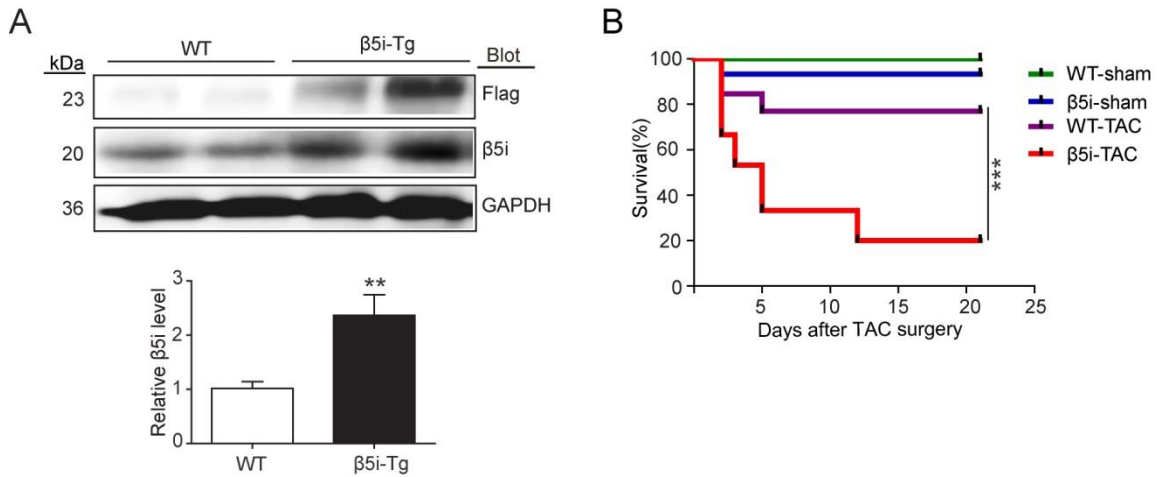

## Supplementary Figure 5

**Fig. S5. Analysis of the β5i expression and survival rate in WT and β5i-Tg mice.** (A) Representative western blot analysis of β5i expression with anti-Flag or β5i antibody in the heart tissues of wild-type (WT) and β5i transgenic (β5i-Tg) mice (left). Quantification of the relative β5i protein level (down, n=6). (B) WT and cardiac-specific β5i transgenic (β5i-Tg) mice were subjected to sham or TAC operation for 3 weeks, then the survival rate was calculated (n=12). Data are presented as mean ± SEM, and n represents number of animals per group. For (A), \*\*P < 0.01 versus WT. For (B), \*\*\*P < 0.001 versus WT+TAC.



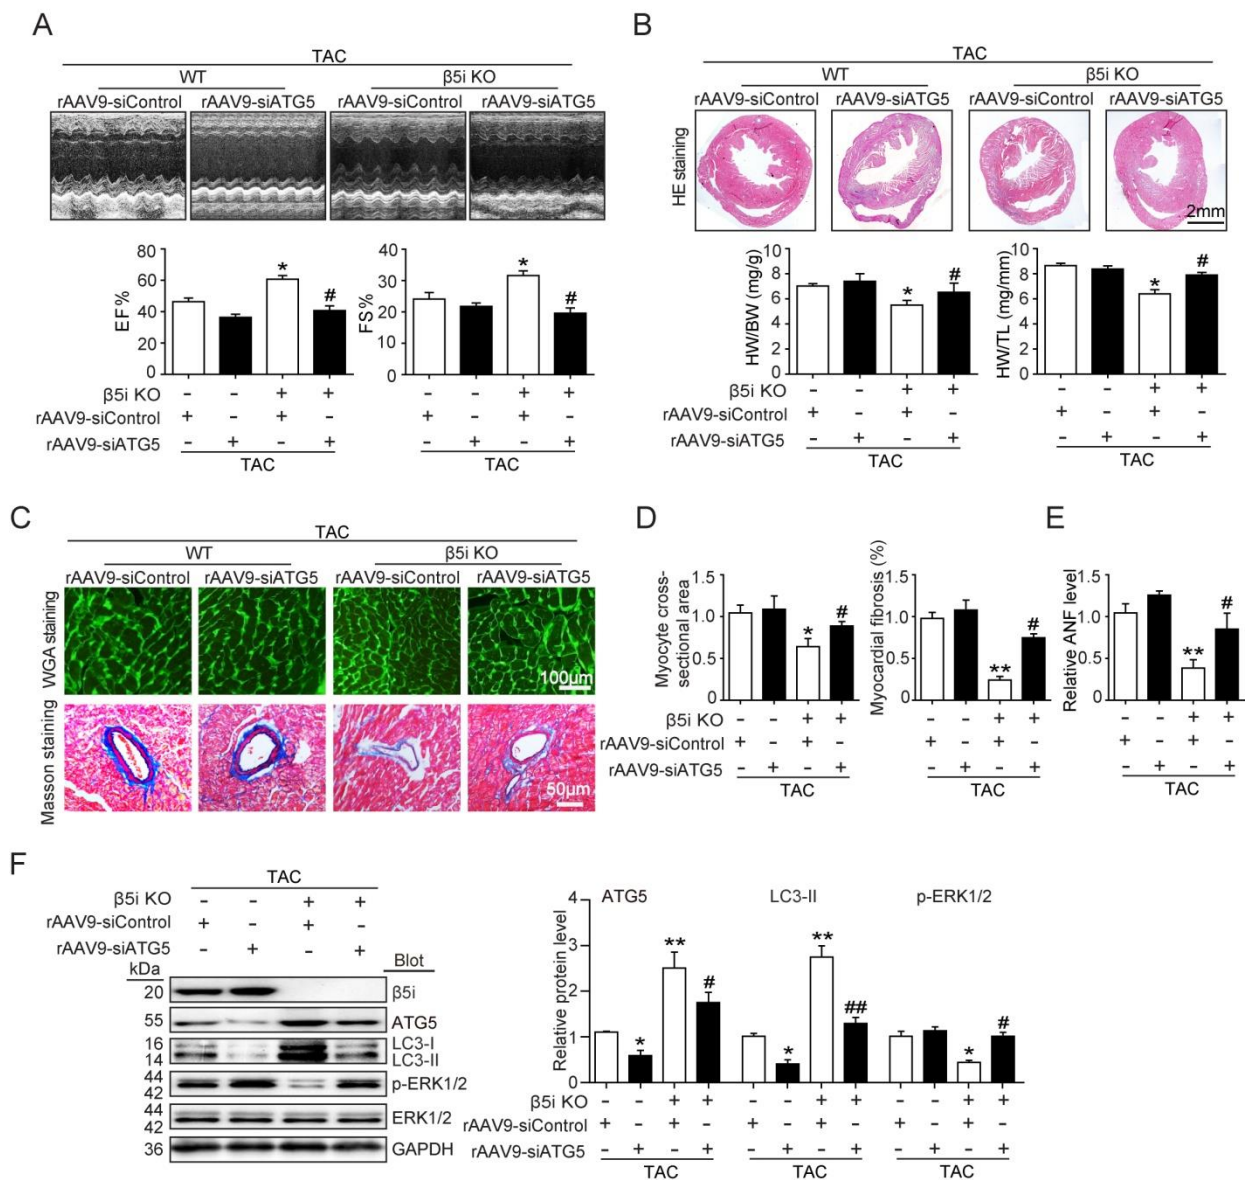

Supplementary Figure 6

**Fig. S6. Knockdown of ATG5 by rAAV9-siATG5 in mice abolishes the cardioprotective effect of β5i KO after pressure overload.** WT and β5i KO mice were injected with rAAV9-siATG5 or rAAV9-GFP ( $1.04 \times 10^{12}$  mg/mg) for 3 weeks and then subjected to TAC operation for additional 6 weeks. **(A)** Representative M-mode echocardiography of the left ventricle (upper). Measurement of ejection fraction (EF%) and fractional shortening (FS%) (lower, n=5). **(B)** Heart size were detected by H&E staining, and heart weight to body weight (HW/BW) and heart weight to tibia length (HW/TL) ratios were calculated (n=5). **(C)** Cardiac myocyte size and fibrosis were detected by FITC-labeled

wheat germ agglutinin (WGA) staining and Masson's Trichrome staining. Scale bar 100  $\mu\text{m}$ . **(D)** Quantification of the relative myocyte cross-sectional area (200 cells counted per heart) and fibrosis. qPCR analyses of ANF mRNA expression (n=5). **(E)** The protein levels of  $\beta\text{5i}$ , ATG5, LC3, p-ERK1/2 and ERK1/2 in the heart tissues and quantification (n=5). GAPDH as an internal control. Data are presented as mean  $\pm$  SEM, and n represents number of animals per group. \* $P < 0.05$ , \*\* $P < 0.01$  versus WT-rAAV9-siControl+TAC, # $P < 0.5$ , # $P < 0.01$  versus  $\beta\text{5i}$  KO-rAAV9-siATG5+TAC.

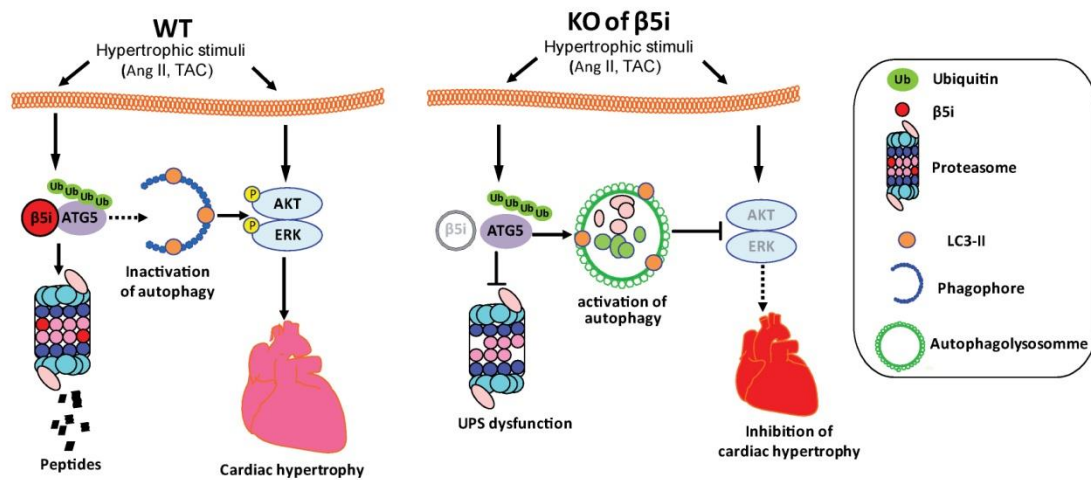

## Supplementary Figure 7

**Fig. S7.** The summarized diagram showing that the proposed mechanisms underlying  $\beta\text{5i}$  regulate cardiac hypertrophy.
